# Supplementary material for: Impaired yolk sac NAD metabolism disrupts murine embryogenesis with relevance to human birth defects
Source: eLife. 2025 Mar 6;13:RP97649. doi: 10.7554/eLife.97649 (PMC11884786; doi:10.7554/eLife.97649)
Supplement: Supplementary file 7. [file elife-97649-supp7.docx]

**Supplementary File 7.** Primers for RT-qPCR.

| **Gene Symbol** | **Forward primer (5’-3’)** | **Reverse primer (5’-3’)** |
| --- | --- | --- |
| *Tdo2* | AGGTGCTGCTCTGCTTGTTT | TGAGCGTGTCAATGTCCATAA |
| *Ido2* | TGCCCTCAGACTTCCTCACT | CGCTGCTCACGGTAACTCTT |
| *Afmid* | AGCCACCTCCCAGAATGAC | TGGAACCACATCCAAGTGTC |
| *Kmo* | GAGCATTAACTTGGCCCTTTC | AGTGGATCATTCTGGCTTTCA |
| *Kynu* | GTTCAGTGGGCTGCACTTTT | CCCAGTCATGTAAGCGGAGT |
| *Haao* | ACAATGGGAGGGCAGTGTAT | CTTCTTACGGGCAGGGTCTT |
| *Qprt* | ACTGGTGGAGAAGTATGGGC | GGCTGCTACATTCCACCTCT |
| *Nadsyn1* | GCCAAAGGCAAAGGTGCAAG | TAGCGAACATTCCGGTGCAT |
| *Nmnat1* | GTGCCCAACTTGTGGAAGAT | CAGCACATCGGACTCGTAGA |
| *Nmnat3* | CCAGAGACCACCTACACCAAA | CCACCCGAATCCAGTCAG |
| *Ubca* | CCCAGTGTTACCACCAAG | ATCACACCCAAGAACAAGC |
| *Ywhazb* | CAGTAGATGGAGAAAGATTTGC | GGGACAATTAGGGAAGTAAGT |

aPreviously published in Gu et al. (Gu et al., 2014). bPreviously published in Jeong et al. (Jeong et al., 2014).

Gu, Y., Shen, X., Zhou, D., Wang, Z., Zhang, N., Shan, Z., Jin, L., & Lei, L. (2014). Selection and Expression Profiles of Reference Genes in Mouse Preimplantation Embryos of Different Ploidies at Various Developmental Stages. *PLOS ONE*, *9*(6), e98956. <https://doi.org/10.1371/journal.pone.0098956>

Jeong, J.-K., Kang, M.-H., Gurunathan, S., Cho, S.-G., Park, C., Seo, H. G., & Kim, J.-H. (2014). Evaluation of reference genes in mouse preimplantation embryos for gene expression studies using real-time quantitative RT-PCR (RT-qPCR). *BMC Research Notes*, *7*(1), 675. <https://doi.org/10.1186/1756-0500-7-675>
